# Supplementary material for: Assessment of gene–disease associations and recommendations for genetic testing for somatic variants in vascular anomalies by VASCERN-VASCA
Source: PubMed Central journal article supplement (PMC11110196; doi:10.1186/s13023-024-03196-9), 2024-05-22
Supplement: 13023_2024_3196_MOESM1_ESM.pdf [file 13023_2024_3196_MOESM1_ESM.pdf]

**Table S1 : Gene-Disease Validity Curation for Mosaic Variants**

**Gene:**   
**Phenotype (ISSVA):**   
 also applies for ISSVA phenotypes:

**1. Genetic evidence**

**1.1. Case-level data**

**1.1.1. Variant evidence**

| Reference<br>PMID, case ID; internal data<br>For internal data, refer to internal case-level data form | Variant<br>cDNA protein | Reported as<br>(specify phenotype designation according to reference, if applicable) | Mosaic Variant<br>Basic Score: 0.5 | Upgrade<br>Pathogenicity: 0-1.5<br>Prediction weak: + 0;<br>Prediction strong: + 0.5;<br>Functional effect: + 0.5-1;<br>Known LPATH: +1; Known PATH: +1.5 | Clustering: 0-1<br>Second observation with same or other variant at same codon: + 1; Neighbouring codons (+/-2): + 0.5 | Score given |
|--------------------------------------------------------------------------------------------------------|-------------------------|--------------------------------------------------------------------------------------|------------------------------------|-----------------------------------------------------------------------------------------------------------------------------------------------------------|------------------------------------------------------------------------------------------------------------------------|-------------|
|                                                                                                        |                         |                                                                                      | 0                                  |                                                                                                                                                           |                                                                                                                        | 0           |
|                                                                                                        |                         |                                                                                      | 0                                  |                                                                                                                                                           |                                                                                                                        | 0           |
|                                                                                                        |                         |                                                                                      | 0                                  |                                                                                                                                                           |                                                                                                                        | 0           |
|                                                                                                        |                         |                                                                                      | 0                                  |                                                                                                                                                           |                                                                                                                        | 0           |
|                                                                                                        |                         |                                                                                      | 0                                  |                                                                                                                                                           |                                                                                                                        | 0           |
|                                                                                                        |                         |                                                                                      | 0                                  |                                                                                                                                                           |                                                                                                                        | 0           |
|                                                                                                        |                         |                                                                                      | 0                                  |                                                                                                                                                           |                                                                                                                        | 0           |
|                                                                                                        |                         |                                                                                      | 0                                  |                                                                                                                                                           |                                                                                                                        | 0           |
|                                                                                                        |                         |                                                                                      | 0                                  |                                                                                                                                                           |                                                                                                                        | 0           |
|                                                                                                        |                         |                                                                                      | 0                                  |                                                                                                                                                           |                                                                                                                        | 0           |
|                                                                                                        |                         |                                                                                      | 0                                  |                                                                                                                                                           |                                                                                                                        | 0           |
|                                                                                                        |                         |                                                                                      | 0                                  |                                                                                                                                                           |                                                                                                                        | 0           |
|                                                                                                        |                         |                                                                                      | 0                                  |                                                                                                                                                           |                                                                                                                        | 0           |
| Total score (maximum score for genetic case level evidence: 12)                                        |                         |                                                                                      |                                    |                                                                                                                                                           |                                                                                                                        | 0           |

**2. Experimental evidence**

Select, if curation of experimental evidence was not or only partially done

Score only experimental evidence that applies for the given type of vascular anomaly (experimental evidence often applies for many/all types of vascular anomalies, unless the respective experiment is specific for one type of vascular anomaly)

| Category                   | Evidence Type                      | Default Score (Range) | Description | Reference (PMID) | Score given |
|----------------------------|------------------------------------|-----------------------|-------------|------------------|-------------|
| 2.1. Function              | Biochemical function               | 0.5 (0-2)             |             |                  |             |
|                            | Protein interaction                | 0.5 (0-2)             |             |                  |             |
|                            | Expression                         | 0.5 (0-2)             |             |                  |             |
| 2.2. Functional Alteration | Patient cells                      | 1 (0-2)               |             |                  |             |
|                            | Non-patient cells                  | 0.5 (0-1)             |             |                  |             |
| 2.3. Models                | Non-human model organism           | 2 (0-4)               |             |                  |             |
|                            | Cell culture model                 | 1 (0-2)               |             |                  |             |
| 2.4. Rescue                | Rescue in human                    | 2 (0-4)               |             |                  |             |
|                            | Rescue in non-human model organism | 2 (0-4)               |             |                  |             |
|                            | Rescue in cell culture model       | 1 (0-2)               |             |                  |             |
|                            | Rescue in patient cells            | 1 (0-2)               |             |                  |             |

Total score 2.1. (maximum score for category: 2)   
 Total score 2.2. (maximum score for category: 2)   
 Total score 2.3. & 2.4. (maximum combined score for categories: 4)

**3. Clinical Validity Summary Matrix**

|                                                                                 | Summary            |
|---------------------------------------------------------------------------------|--------------------|
| Genetic evidence (0 to 12)                                                      | 0                  |
| Experimental evidence (0 to 6)                                                  | 0                  |
| Total points (sum of genetic & experimental evidence)                           | 0                  |
| Replication over time: >2 publ. w/ convincing evidence over time (>3 yrs) (Y/N) |                    |
| Indicate PMID (replication 1)                                                   |                    |
| Indicate PMID (replication 2)                                                   |                    |
| Indicate PMID (replication 3)                                                   |                    |
| <b>Calculated classification</b>                                                | <b>NO EVIDENCE</b> |
| Valid contradictory evidence (Y/N)                                              |                    |
| if Y, list PMIDs for contradictory evidence                                     |                    |
| if Y, describe contradictory evidence (if applicable)                           |                    |
| <b>Curator classification</b>                                                   | <b>NO EVIDENCE</b> |
| <b>Final classification (to be entered manually after panel discussion)</b>     |                    |

**Commentary:**

Select, if curation of experimental evidence was not or only partially done  
 No scorable experimental evidence exists at the time of curation  
 Experimental evidence exists but was not curated because of sufficient scores for genetic evidence  
 Experimental evidence was only partially curated because of sufficient scores for genetic evidence
